# Supplementary material for: Identification and In Vivo Validation of Unique Anti-Oncogenic Mechanisms Involving Protein Kinase Signaling and Autophagy Mediated by the Investigational Agent PV-10
Source: MDPI journal article supplement (doi:10.3390/cancers16081520), 2024-04-16

**Table S1.** Characteristics of the adult solid tumor cell lines used in this study.

| <b>Tumor</b>  | <b>Cell line</b> | <b>Age/sex</b> | <b>Genetic abnormalities</b>                                                                                                                                                                        |
|---------------|------------------|----------------|-----------------------------------------------------------------------------------------------------------------------------------------------------------------------------------------------------|
| Breast        | MCF-7            | 69/F           | CDKN2A Hom Del; GATA3 Het N336Mfs*17; PIK3CA Het E545K; Lacks TP53 mutation                                                                                                                         |
|               | MDA-MB-231       | 51/F           | Triple negative; BRAF Het G464V; CDKN2A Del; KRAS Het G13D; TERT C228T; TP53 Hom R280K                                                                                                              |
|               | T-47D            | 54/F           | PIK3CA Het H1047R; TP53 Hom L194F                                                                                                                                                                   |
| Colorectal    | HCT-116          | 48/M           | ACVR2A Hom K437Rfs*5; BRCA2 Het I2675Dfs*6; CDKN2A Het R24fs*20 and E74fs*15; CTNNB1 Het S45del; EP300 Hem c.6294delA; KRAS Het G13D; PIK3CA Het H1047R; TGFBR2 Hom K128Sfs*35; Lacks TP53 mutation |
|               | LoVo             | 56/M           | ACVR2A Hom K437Rfs*5; APC Het R114Ter; APC Het M1431fs*42; APC Het R2816Q; B2M Het L15Ffs*41; FBXW7 Het R505C; KRAS Het G13D; SMAD2 Het A292V; TGFBR2 Hom K128Sfs*35; Lacks TP53 mutation           |
|               | T-84             | 72/M           | APC Hom L1488fs*19; KRAS Het G13D; PIK3CA E542K; SMAD4 K340N                                                                                                                                        |
| Head and neck | CAL-27           | 56/M           | TERT c.228C>T; TP53 H193L                                                                                                                                                                           |
|               | Detroit-562      | */F            | TP53 R175H                                                                                                                                                                                          |
|               | FaDu             | 56/M           | CDKN2A Hom c.151-1G>T; TP53 Het R248L and Y126_K132del                                                                                                                                              |
|               | UM-SCC-1         | 72/M           | Lacks TP53 mutation                                                                                                                                                                                 |
| Testicular    | NCC-IT           | 24/M           | MAP2K4 K309N; TP53 Hom V272Cfs*73; PTEN Het R173P                                                                                                                                                   |
|               | NTERA-2          | 22/M           | High TP53 expression but lowered p53 activity due to K370me1 and K382me1 monomethylation                                                                                                            |
|               | TCAM-2           | 35/M           | BRAF V600E; Lacks CD30, SSX2-4, and SOX2 expression                                                                                                                                                 |

\* Age/sex unknown

**Table S2.** Pathology report of tissue isolated from normal mice orally treated with rose bengal.

| <b>Tissue</b> | <b>Specimen A<br/>(0 mg/kg)</b>                                                                 | <b>Specimen B<br/>(50 mg/kg)</b>                                                                                  | <b>Specimen C<br/>(100 mg/kg)</b>                                                     | <b>Specimen D<br/>(200 mg/kg)</b>                                                                                 |
|---------------|-------------------------------------------------------------------------------------------------|-------------------------------------------------------------------------------------------------------------------|---------------------------------------------------------------------------------------|-------------------------------------------------------------------------------------------------------------------|
| Brain         | No specific pathology                                                                           | No specific pathology                                                                                             | No specific pathology                                                                 | No specific pathology                                                                                             |
| Heart         | No specific pathology                                                                           | No specific pathology                                                                                             | No specific pathology                                                                 | No specific pathology                                                                                             |
| Kidney        | Malignant neoplasm identified: Perinephric tumor, cytologically compatible with lymphoid origin | No specific pathology identified in renal parenchyma; Adrenal tissues also identified, without specific pathology | No specific pathology identified in renal parenchyma                                  | No specific pathology identified in renal parenchyma; Adrenal tissues also identified, without specific pathology |
| Liver         | No specific pathology                                                                           | No specific pathology                                                                                             | No specific pathology                                                                 | No specific pathology                                                                                             |
| Lung          | No specific pathology                                                                           | No specific pathology                                                                                             | No specific pathology                                                                 | No specific pathology                                                                                             |
| Spleen        | No specific pathology; Pancreatic tissues also identified, without specific pathology           | No specific pathology; Pancreatic tissues also identified, without specific pathology                             | No specific pathology; Pancreatic tissues also identified, without specific pathology | No specific pathology; Pancreatic tissues also identified, without specific pathology                             |

Figure S2A

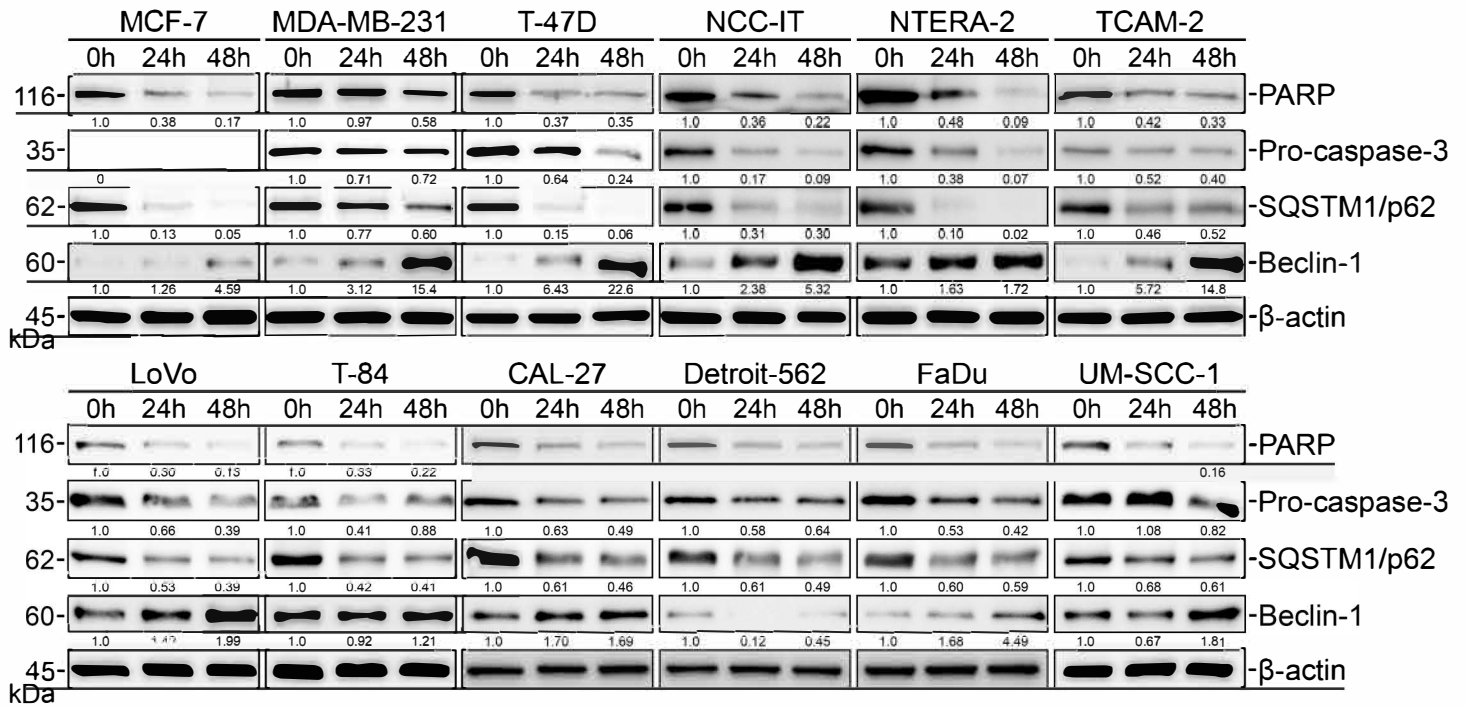

Figure S3C

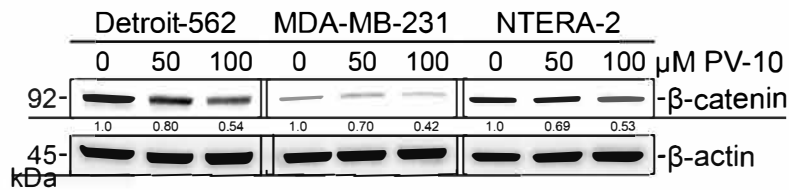

Figure S2A

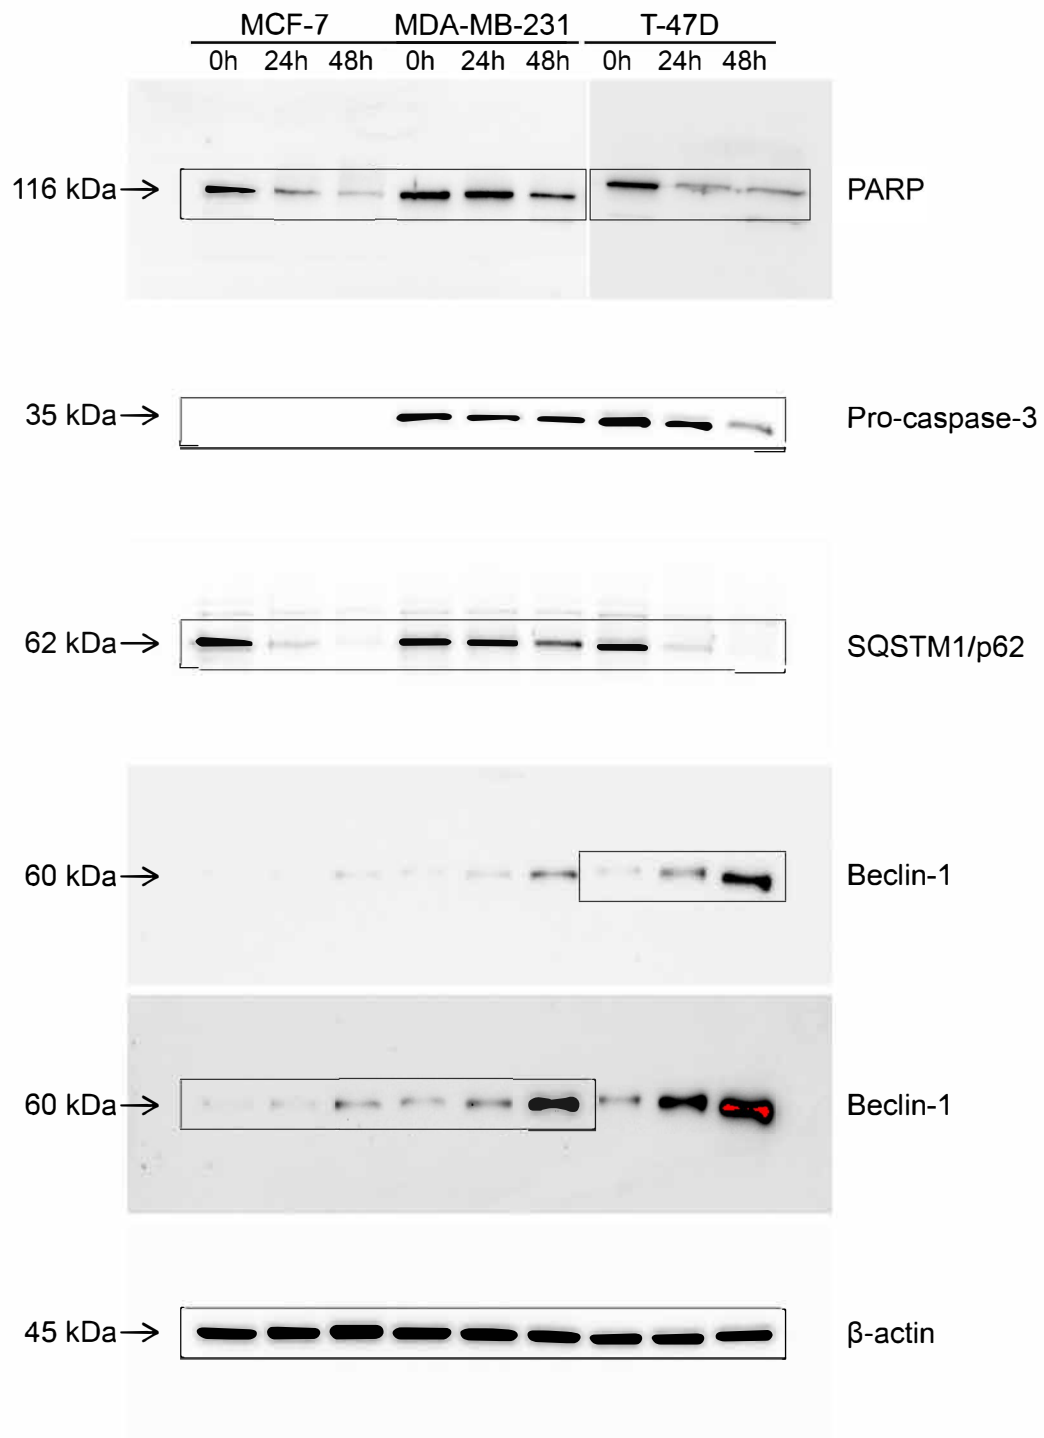

Figure S2A

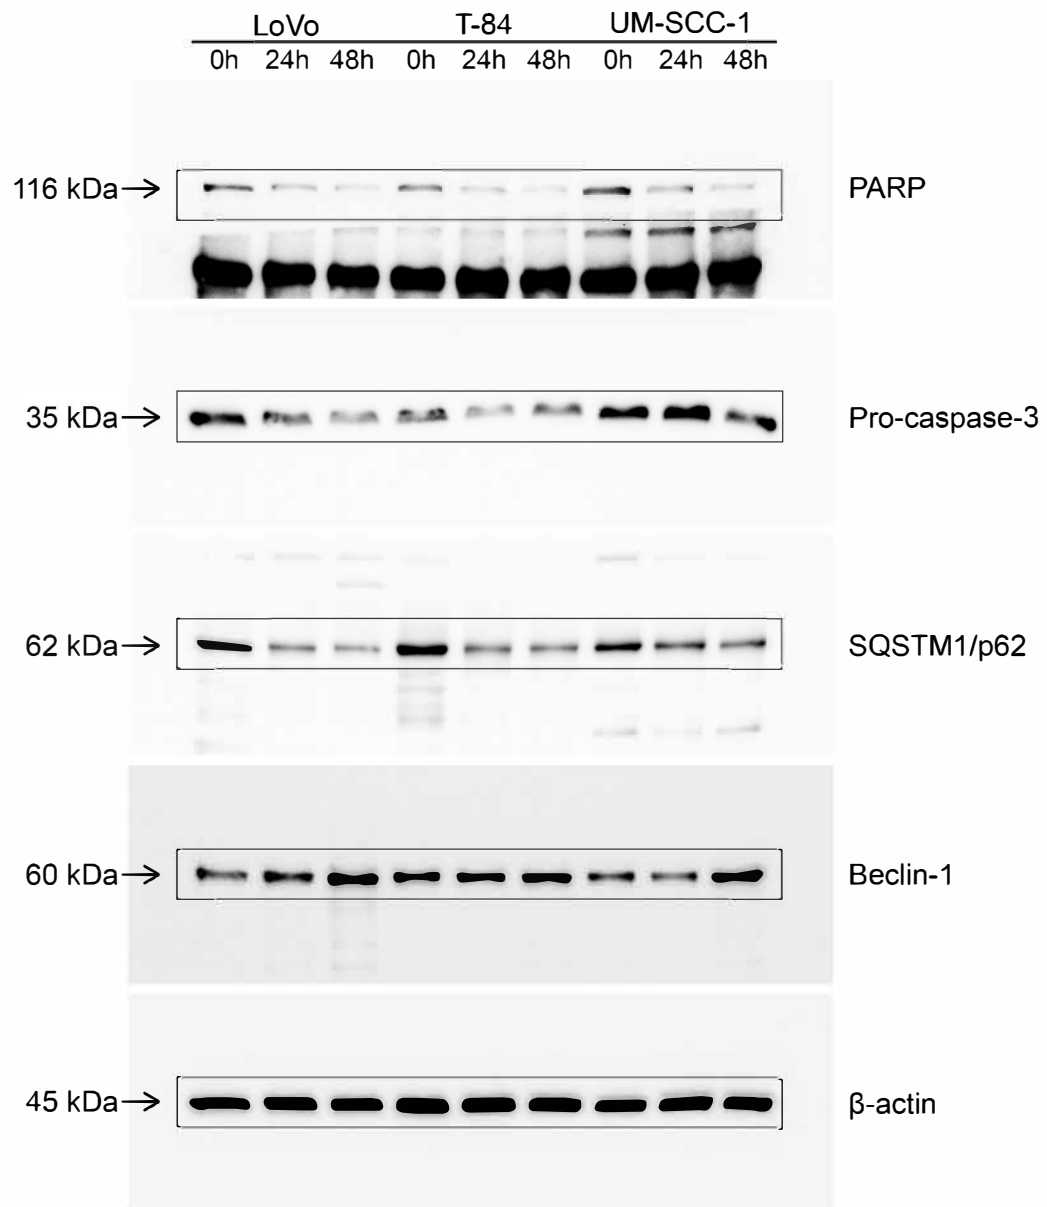

Figure S2A

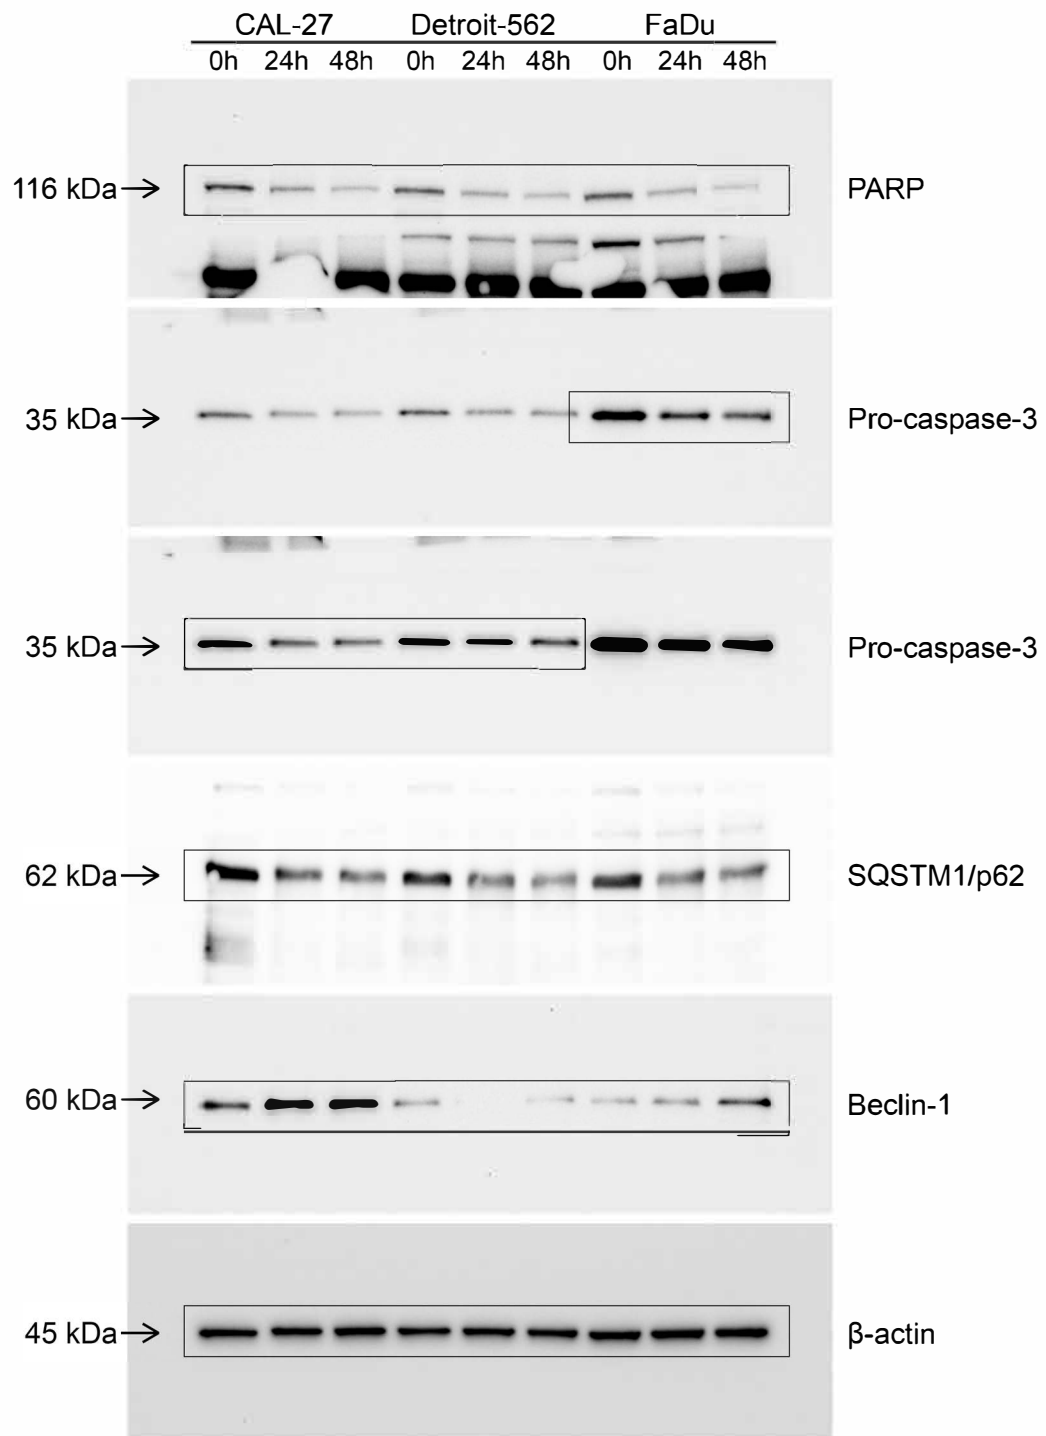

**Figure S2A**

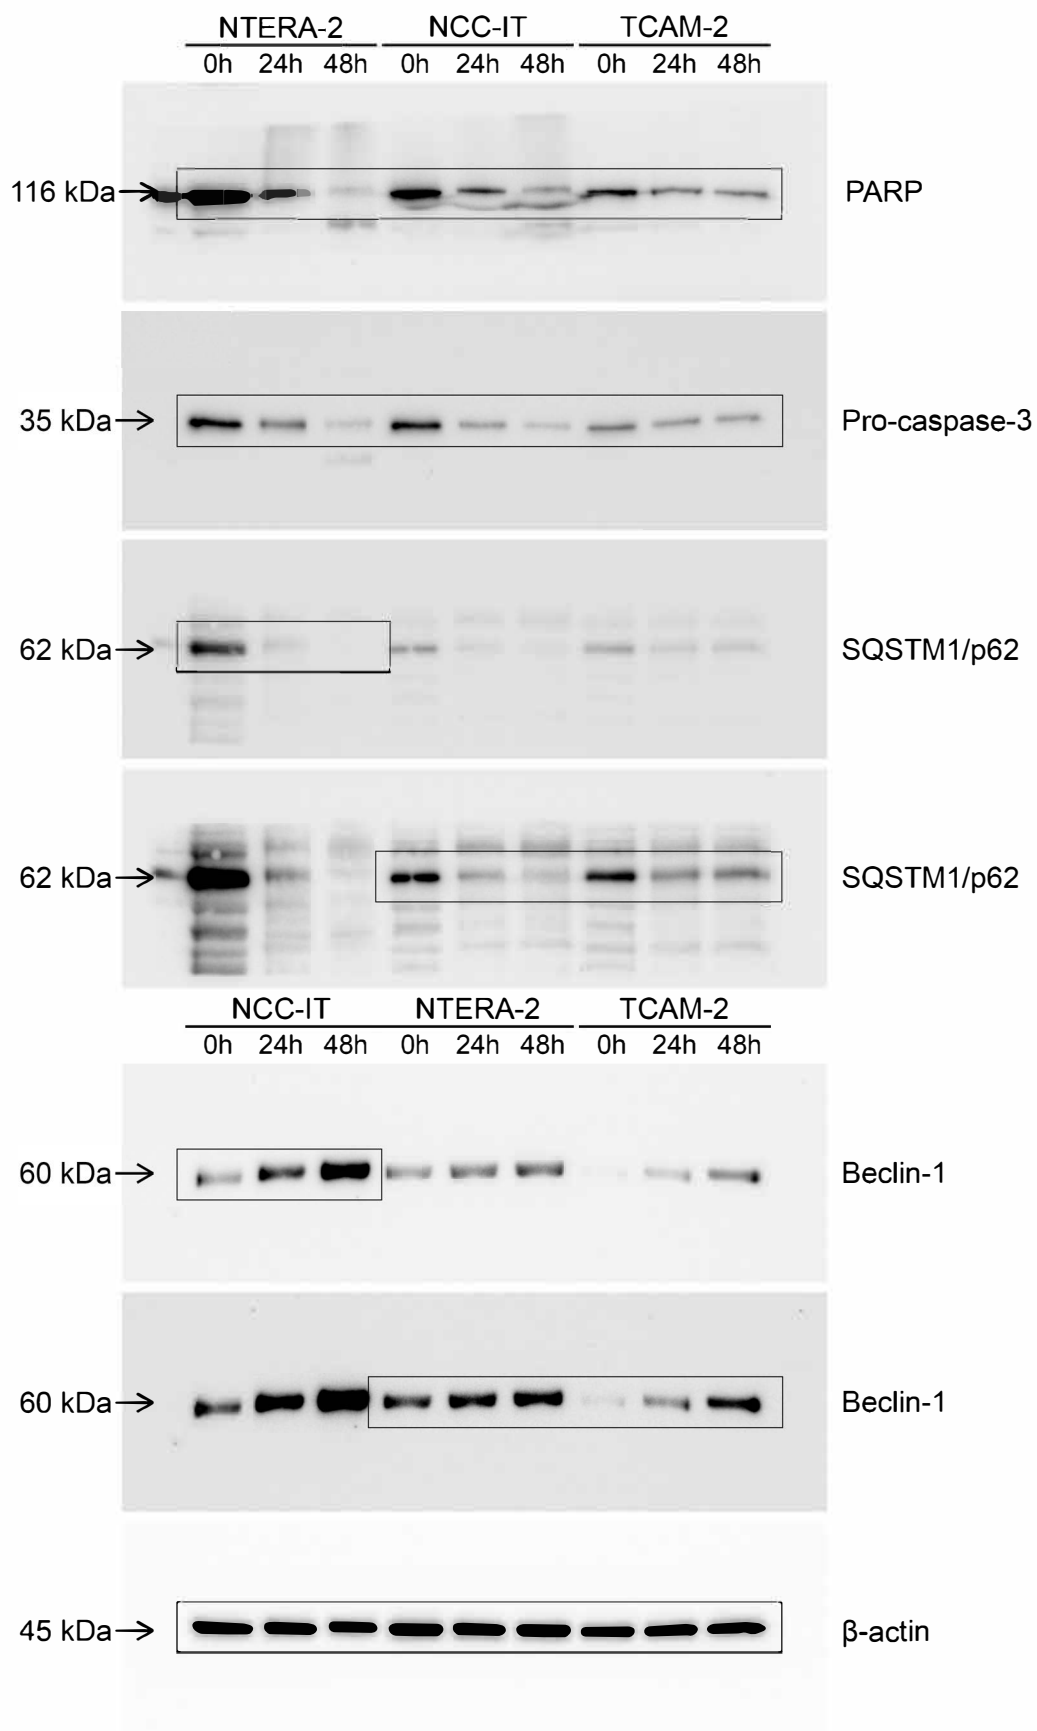

Figure S3B

p-WNK1 (T60) F7,F8  
p-GSK-3 $\alpha$ / $\beta$  (S21/S9) C5,C6  
Reference A1,A2,A17,A18,G1,G2

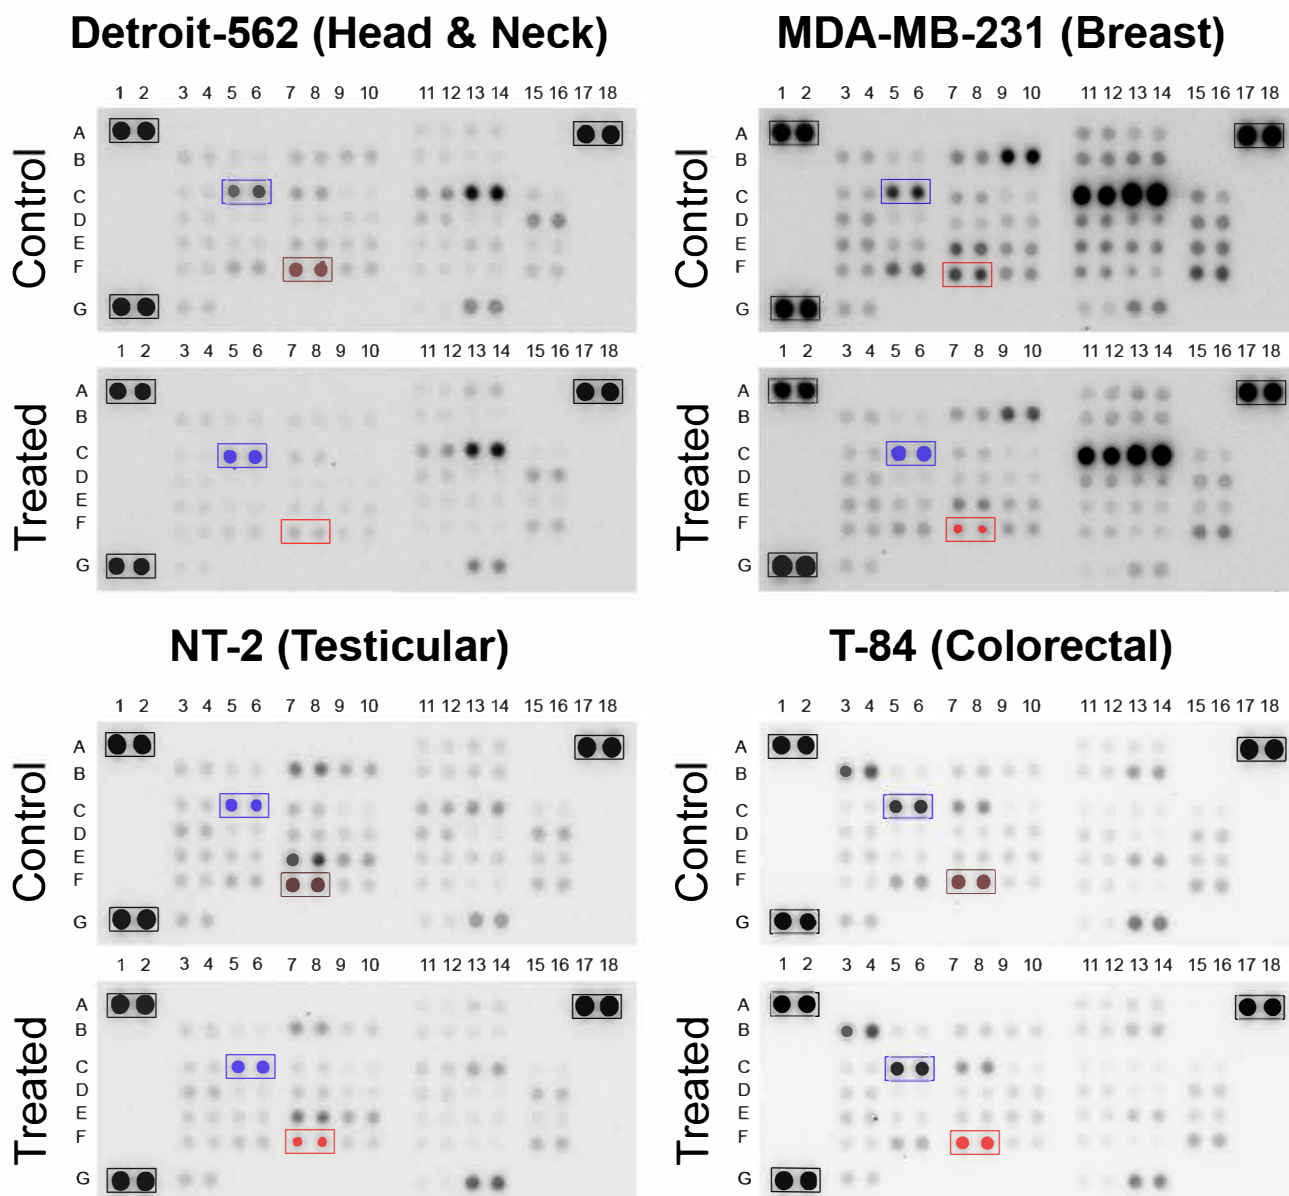

# Figure S3C

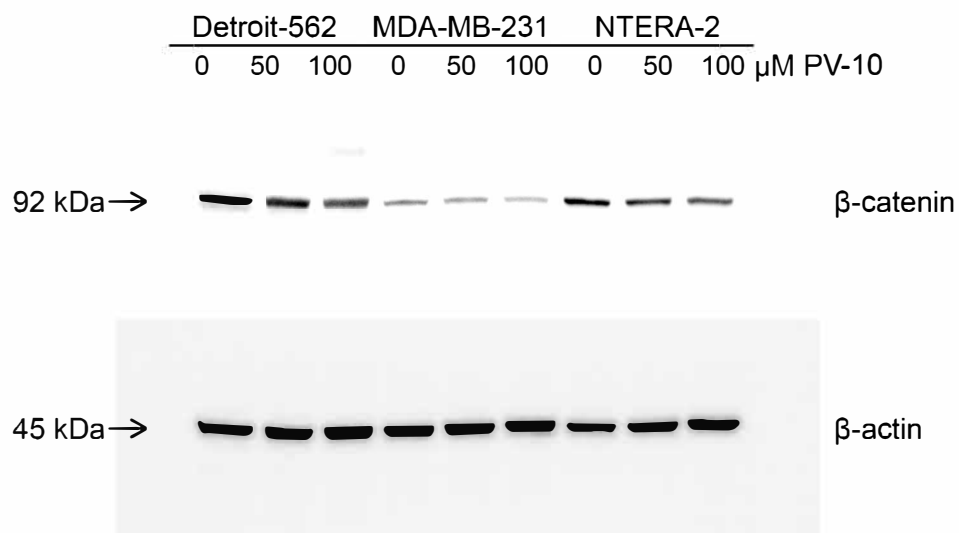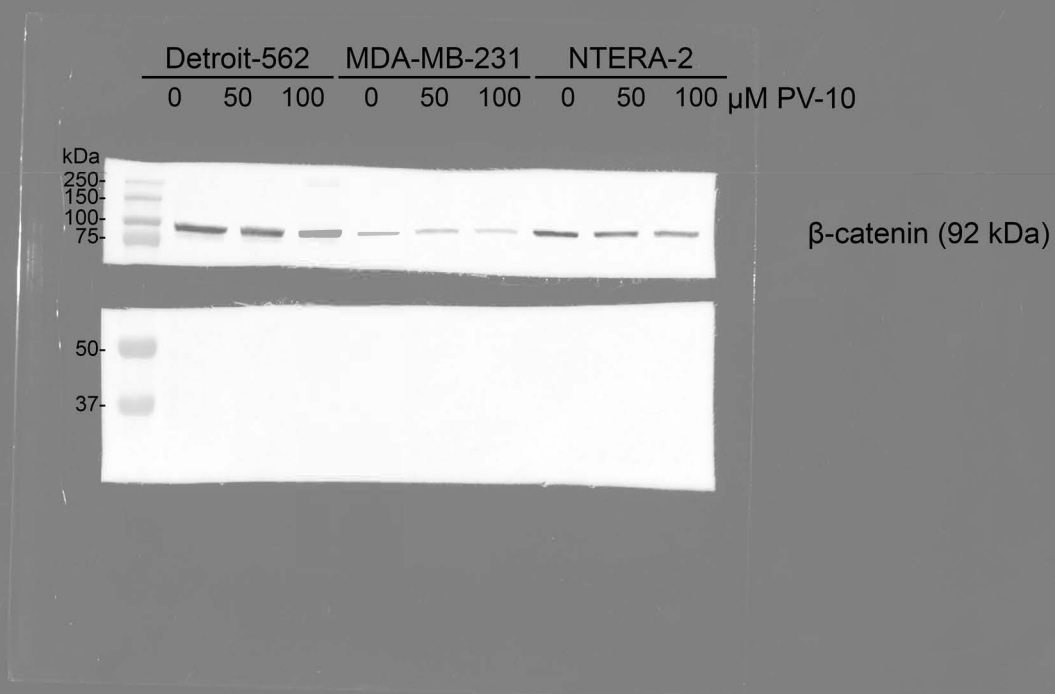

Supplement: s1 [file s1]
